# Supplementary material
Source: publisher site journal article supplement (https://www.dovepress.com/article/289692)
Supplement: Supplementary file 1 [file get_supplementary_file.php]

**Supplementary Text 1** Questionnaire to assess medication preferences

We would like to ask you about your preferences regarding medication used for rheumatoid arthritis.
For each question, please circle one answer which is most likely to reflect your opinion.

1. What is the preferred route of administration?
   1. Parenteral: intravenous
   2. Parenteral: subcutaneous
   3. Oral
2. What is the preferred frequency of administration in the case of parenteral administration?
   1. Biweekly
   2. Monthly
   3. 3-monthly
   4. 6-monthly
3. What is the preferred frequency of administration in the case of oral administration?
   1. Twice per day
   2. Once per day
   3. Once per week
4. What is the preferred time until the effect of onset?
   1. Up to 1 week
   2. Up to 2 weeks
   3. Up to 1 month
   4. Up to 3 months
5. What is your preference regarding drug combinations used for your rheumatoid arthritis?
   1. Drug combination is not preferred
   2. Treatment which requires daily combination is acceptable
   3. Treatment which requires combination with another drug once a week is acceptable
6. What is the most acceptable potential side effect of the medication used for rheumatoid arthritis?
   1. Increased risk for infections
   2. Allergic reaction
   3. Deterioration of my laboratory values
   4. Increased risk for malignancies
   5. Weight gain
   6. Hair thinning or loss
   7. Skin symptoms, eg, injection site reaction, rash
   8. Effect on fertility
   9. Increased risk for cardiovascular diseases

**Supplementary Text 2** Methods for conducting logistic regression analysis

For the application of regression analysis, missing/unknown data for prognostic factors were imputed. Imputation was accomplished by a regression-based single imputation method in which missing values of one predictor variable were predicted by regression models, with a set of remaining potential prognostic variables as independent variables.

Regression analyses were evaluated for the full analysis set (which included all patients who fulfilled all inclusion criteria) and conducted on imputed data. Potential prognostic factors used for the regression models were specified and categorical predictors were dichotomized/grouped in order to simplify interpretation. Backward elimination with a significance level of 0.05 was applied to stepwise automatically select relevant predictors.

Each of the following variables was used as a dependent (ie, response) variable in separate multivariable logistic regression models:

- Model 1: Switching to a different DMARD planned (yes)
- Model 2: Switching to a different DMARD planned (no)
- Model 3: Switching to a tsDMARD planned (yes, no)
- Model 4: Patient preference for oral administration (yes, no)
- Model 5: Patient preference for monotherapy (yes, no)
- Model 6: Good adherence (yes, no)
- Model 7: Good treatment satisfaction (yes, no)

Variables considered as potential predictors for all models (ie, independent variables) are presented in Supplementary Table 2.

**Supplementary Table 1** List of local ethics committees that provided ethics approval for the SENSE study

| Site ID | Country | Primary institution | City and postal code | Ethics committee | Notes |
| --- | --- | --- | --- | --- | --- |
| AR-03 | Argentina | DIM Clinica Privada | Ramos Mejía,1704 | Comité de Etica en Investigacion DIM Clinica Privada | — |
| AR-04 | Argentina | Hospital Gral. de Agudos J.M. Ramos Mejía | Buenos Aires, C1221ADC | Comité de Etica en Investigacion Hospital de Agudos J.M. Ramos Mejía | — |
| AR-05 | Argentina | Instituto de Rehabilitación Psicofísica | Buenos Aires, 1428 | Comité de Etica en Investigacion Instituto de Rehabilitación Psicofísica (IREP) | — |
| AR-01 | Argentina | CEIM Investigaciones Medica | Buenos Aires, 1425 | Comité Independiente de Ética para Ensayos en Farmacología Clínica | — |
| AR-02 | Argentina | Hospital Interzonal Gral Agudos San Martin | La Plata, 1900 | Comité de Etica Centro Medico Framingham | — |
| BR-01 | Brazil | Centro Multidisciplinar de Estudos Clínicos | Santo André, BR-CE, 09190-615 | Comitê de Ética em Pesquisa da Faculdade de Medicina do ABC (CEP-FMABC) | — |
| BR-02 | Brazil | Santa Casa de Belo Horizonte | Belo Horizante, BR-MG, 30150-221 | Comitê de Ética em Pesquisa da Santa Casa de Belo Horizonte (CEP – SCBH) | — |
| BR-03 | Brazil | Fundacao Faculdade Regional de Medicina de São José do Rio Preto | São José Do Rio Preto, BR-CE,15090-000 | Comitê de Ética em Pesquisa em Seres Humanos da Faculdade de Medicina de São José do Rio Preto (CEP-FAMERP) | — |
| BR-04 | Brazil | Centro Mineiro de Pesquisa | Juiz De Fora, BR-MG, 36010570 | Comitê de Ética em Pesquisa do Hospital Universitário da Universidade Federal de Juiz de Fora (HU-UFJF) | — |
| BG-01 | Bulgaria | UMHAT Sveti Ivan Rilski | Sofia, 1612 | Not required | — |
| BG-02 | Bulgaria | Excelsior Medical Center | Sofia, 1407 | Not required | — |
| CL-02 | Chile | Hospital Victoria | Victoria, 4720 000 | Comité de Etica de la Investigacion Servicio de Salud Metropolitano Norte | — |
| CL-01 | Chile | Centro Medico Prosalud | Santiago,7510047 | Comité de Etica Cientifica Servicio Salud Araucanía Sur | — |
| HR-05 | Croatia | Klinički Bolnički Centar Split | Split, 21000 | Klinički Bolnički Centar Split | 1. The SENSE study was first submitted to the central EC. Based on the submitted documentation, the central EC issued an opinion on the acceptability of the study.  2. After obtaining a positive opinion from the central EC, the clinical trial was submitted to the Agency for Medicinal Products and Medical Devices. Based on the submitted documentation and the central EC’s positive opinion, the Agency for Medicinal Products and Medical Devices granted approval for study conduct.  3. Some institutions (hospitals) also requested that the study be submitted to their Institutional Committees, so approvals were also obtained from the Institutional Committees in Croatia listed in column E. |
| HR-01 | Croatia | Klinički Bolnički Centar Zagreb | Zagreb, 10000 | Klinički Bolnički Centar Zagreb |
| HR-03 | Croatia | Klinički Bolnički Dubrava Zagreb | Zagreb, 10000 | Klinički Bolnički Dubrava Zagreb Klinička Bolnica Dubrava Zagreb |
| HR-04 | Croatia | Klinički Bolnički Centar Sestre Milosrdnice | Zagreb, 10000 | Klinički Bolnički Centar Sestre Milosrdnice |
| HR-02 | Croatia | Klinički Bolnički Centar Zagreb | Zagreb, 10000 | Klinički Bolnički Centar Zagreb |
| CZ-02 | Czech Republic | Revmatolog s.r.o. | Jihlava, 58601 | Ethics Committee of the University Hospital Motol, V Úvalu 84, Prague 5, 150 06, Czech Republic | — |
| CZ-04 | Czech Republic | Revma Praha s.r.o. | Prague, 15800 | Ethics Committee of the University Hospital Motol, V Úvalu 84, Prague 5, 150 06, Czech Republic | — |
| CZ-06 | Czech Republic | Fakultni Nemocnice v Motole | Prague, 15006 | Ethics Committee of the University Hospital Motol, V Úvalu 84, Prague 5, 150 06, Czech Republic | — |
| CZ-01 | Czech Republic | INREA s.r.o. | Ostrava,703 00 | Ethics Committee of the University Hospital Motol, V Úvalu 84, Prague 5, 150 06, Czech Republic | — |
| CZ-05 | Czech Republic | Revmatologicke Centrum s.r.o. | Velke Bilovice, 69102 | Ethics Committee of the University Hospital Motol, V Úvalu 84, Prague 5, 150 06, Czech Republic | — |
| CZ-03 | Czech Republic | Revimex PRO s.r.o. | Karvina, 733 01 | Ethics Committee of the University Hospital Motol, V Úvalu 84, Prague 5, 150 06, Czech Republic | — |
| EE-02 | Estonia | Tartu University Hospital | Tartu, 50406 | Research Ethics Committee of the National Institute for Health Development | — |
| EE-01 | Estonia | East Tallinn Central Hospital | Tallinn, 11312 | Research Ethics Committee of the National Institute for Health Development | — |
| EE-03 | Estonia | Pärnu Hospital | Tallinn, 11312 | Research Ethics Committee of the National Institute for Health Development | — |
| GR-01 | Greece | University General Hospital of Heraklion, Crete | Voutes Herakleio, 71500 | IRB/IEC of the University General Hospital of Heraklion, Crete | — |
| GR-02 | Greece | Metropolitan General Hospital | Athens, 15562 | IRB/IEC of the Metropolitan General Hospital | — |
| GR-03 | Greece | OLYMPION Hospital – General Clinic of Patras | Patras, 26221 | IRB/IEC of the OLYMPION Hospital – General Clinic of Patras | — |
| GR-04 | Greece | IASIO-General Clinic of Kallithea | Kifissia, 14561 | IRB/IEC of the IASIO-General Clinic of Kallithea | — |
| GR-05 | Greece | University General Hospital of Alexandroupoli | Alexandroupoli, 68100 | IRB/IEC of the University General Hospital of Alexandroupoli | — |
| GR-06 | Greece | Euromedica General Clinic of Thessaloniki | Thessaloniki, 54623 | IRB/IEC of the Euromedica General Clinic of Thessaloniki | — |
| GR-07 | Greece | Henry Dunant Hospital Center | Athens, 11526 | IRB/IEC of the Henry Dunant Hospital Center | — |
| GR-08 | Greece | General Hospital of Patras "Agios Andreas" | Patras, 26335 | IRB/IEC of the General Hospital of Patras "Agios Andreas" | — |
| GR-09 | Greece | Naval Hospital of Athens | Athens, 11521 | IRB/IEC of the Naval Hospital of Athens | — |
| HU-01 | Hungary | Budai Irgalmasrendi Kórház | Budapest, 1027 | Study protocol approval was obtained from the central EC: the Medical Research Council, Scientific and Research Ethics Committee, Hungary | — |
| HU-03 | Hungary | Békés Megyei Pándy Kálmán Kórháza | Gyula, 5700 |
| HU-04 | Hungary | Hévízgyógyfürdő és Szent András Reumakórház | Heviz, 8380 |
| HU-06 | Hungary | Szabolcs – Szatmár – Bereg Megyei Kórházak és Egyetemi Oktató Kórház | Nyiregyhaza, 4400 |
| HU-05 | Hungary | Miskolci Semmelweis Kórház és Egyetemi Oktatókórház | Miskolc,3529 |
| HU-02 | Hungary | Petz Aladár Megyei Oktató Kórház | Gyor, 9023 |
| IR-03 | Ireland | St. James's Hospital | Dublin 8,00000 | Tallaght University Hospital/St. James's Hospital Joint Research Ethics Committee. Tallaght University Hospital, Dublin 24, Ireland | — |
| IR-02 | Ireland | Cork University Hospital | Cork, T12 DFK4 | Clinical Research Ethics Committee of the Cork Teaching Hospitals, Lancaster Hall, 6 Little Hanover Street, Cork, Ireland | — |
| IR-01 | Ireland | Croom Orthopaedic Hospital | Limerick, V35 F434 | HSE Mid-Western Regional Hospital Research Ethics Committee, University Hospital Limerick, Limerick, Ireland | — |
| JP-08 | Japan | Nagasaki University | Nagasaki, 852-8501 | 長崎大学病院臨床研究倫理委員会 (Nagasaki University Hospital Clinical Research Ethics Committee) | — |
| JP-06 | Japan | Kyoto Prefectural University of Medicine | Kyoto-Shi, 602-8566 | 京都府立医科大学医学倫理審査委員会 (Kyoto Prefectural University of Medicine Medical Ethics Review Committee） | — |
| JP-05 | Japan | Kobe University | Kobe-Shi, 650-0017 | 神戸大学医学部附属病院臨床研究推進センター倫理審査委員会 (Kobe University Hospital Clinical & Translational Research Center) | — |
| JP-09 | Japan | Yoshida Orthopaedic Clinic | Morioka, 020-0015 | 代々木メンタルクリニック倫理審査委員会 (Yoyogi Mental Clinic Ethical Review Committee) | — |
| JP-02 | Japan | Setagaya Rheumatology Clinic | Tokyo, 156-0052 | 代々木メンタルクリニック倫理審査委員会 (Yoyogi Mental Clinic Ethical Review Committee) | — |
| JP-03 | Japan | Hiroshima University | Hiroshima-Shi, 734-8551 | 広島臨床研究開発支援センター臨床研究倫理審査委員会 (Clinical Research Center in Hiroshima) | — |
| JP-07 | Japan | Hokkaido University | Sapporo-Shi, 060-8648 | 北海道大学病院自主臨床研究審査委員会 (Hokkaido University Hospital Division of Clinical Research Administration) | — |
| JP-01 | Japan | Yamagata University School of Medicine | Yamagata-Shi, 990-9585 | 山形大学医学部倫理審査委員会 (Ethical Review Committee of Yamagata University Faculty of Medicine) | — |
| JP-04 | Japan | The University of Tokyo | Tokyo, 113-8655 | 東京大学大学院医学系研究科・医学部　介入等研究倫理委員会 (Graduate School of Medicine and Faculty of Medicine, the University of Tokyo) | — |
| LV-01 | Latvia | P. Stradins Clinical University Hospital | Riga, 1002 | Ethics Committee for Clinical Research at Pauls Stradins Clinical University Hospital Development Society | — |
| LT-02 | Lithuania | Hospital of Lithuanian University of Health Sciences Kaunas Clinics | Kaunas, 50161 | Kaunas Regional Biomedical Research Ethics Committee | — |
| LT-01 | Lithuania | Klaipeda University Hospital | Klaipeda, 92288 | Kaunas Regional Biomedical Research Ethics Committee | — |
| PL-05 | Poland | Slaskie Centrum Reumatologii | Ustroń, 43-450 | EC not required – notification processed | — |
| PL-02 | Poland | Specjalistyczna Praktyka Lekarska Katarzyna Smolik | Tychy, 43-100 | EC not required – notification processed | — |
| PL-04 | Poland | Ortopedyczno-Rehabilitacyjny Szpital Kliniczny | Poznan, 61-545 | EC not required – notification processed | — |
| PL-03 | Poland | Gabinet Internistyczno – Reumatologiczny Izabela Domyslawska | Bialystok, 15-276 | EC not required – notification processed | — |
| PL-01 | Poland | Prywatny Gabinet Lekarski – Grazyna Swierkowska | Lodz, 93-513 | EC not required – notification processed | — |
| RO-07 | Romania | Spitalul Clinic Dr. I. Cantacuzino | Bucharest, 020475 | National Committee of Bioethics for Medicines and Medical Devices | — |
| RO-01 | Romania | Spitalul Clinic Sfanta Maria Bucuresti | Bucharest, 011172 | National Committee of Bioethics for Medicines and Medical Devices | — |
| RO-02 | Romania | Spitalul Clinic Sfanta Maria Bucuresti | Bucharest, 011172 | National Committee of Bioethics for Medicines and Medical Devices | — |
| RO-03 | Romania | Spitalul Clinic de Recuperare Iasi | Iasi, 700661 | National Committee of Bioethics for Medicines and Medical Devices | — |
| RO-08 | Romania | Spitalul Clinic de Recuperare Iasi | Iasi, 700661 | National Committee of Bioethics for Medicines and Medical Devices | — |
| RO-04 | Romania | Spitalul Clinic Judetean de Urgenta Cluj | Cluj-Napoca, 400006 | National Committee of Bioethics for Medicines and Medical Devices | — |
| RO-05 | Romania | Spitalul Clinic de Recuperare Cluj-Napoca | Cluj-Napoca, 400437 | National Committee of Bioethics for Medicines and Medical Devices | — |
| RO-06 | Romania | Spitalul Clinic Judetean de Urgenta Targu Mures | Targu Mures, 540136 | National Committee of Bioethics for Medicines and Medical Devices | — |
| RU-03 | Russia | Institution KhMAO-Ugra Regional Clinical Hospital | Khanty-Mansiysk, 628011 | Independent Interdisciplinary Ethics Committee for Clinical Studies | — |
| RU-02 | Russia | Research Institute of Rheumatology | Moscow, 115522 | Independent Interdisciplinary Ethics Committee for Clinical Studies | — |
| RU-01 | Russia | Moscow Regional Research Clinical Institute MF Vladimirskiy | Moscow, 129110 | Independent Interdisciplinary Ethics Committee for Clinical Studies | — |
| RU-04 | Russia | Yaroslavl State Medical University | Yaroslavi, 150000 | Independent Interdisciplinary Ethics Committee for Clinical Studies | — |
| SK-02 | Slovakia | ROMJAN s.r.o. | Bratislava, 821 08 | Ethics Committee of Bratislava Autonomous Region, Sabinovská 16, 820 05  Bratislava, Slovak Republic | — |
| SK-03 | Slovakia | Novamed s.r.o. | Banská Bystrica, 97405 | Independent Ethics Committee of Banská Bystrica Autonomous Region, Nám. SNP 23, 974 01, Banská Bystrica, Slovak Republic | — |
| SK-04 | Slovakia | Univerzitna Nemocnica Bratislava | Bratislava, 82606 | Ethics Committee, University Hospital Bratislava, Pažítková 4, 821 01 Bratislava, Slovak Republic | — |
| SK-01 | Slovakia | Ambulance Karpatská – Private Practice | Poprad, 058 01 | Ethics Committee of Prešov Autonomous Region, Námestie Mieru 2, 080 01 Prešov, Slovak Republic | — |
| TR-05 | Turkey | Inonu University Turgut Ozal Medical Center Education and Research Hospital | Malatya, 44280 | One central EC under coordinating site per local regulation | One central EC under coordinating site per local regulation |
| TR-01 | Turkey | Hacettepe University Faculty of Medicine | Ankara, 6100 | Hacettepe University Clinical Research Ethic Boards (one central EC under coordinating site per local regulation) |
| TR-02 | Turkey | Marmara University Istanbul Pendik Education and Research Hospital | Istanbul, 34899 | One central EC under coordinating site per local regulation |
| TR-03 | Turkey | Sivas Cumhuriyet University Health Services Application and Research Hospital | Sivas, 58140 | One central EC under coordinating site per local regulation |
| TR-04 | Turkey | Istanbul University Cerrahpasa-Cerrahpasa Faculty of Medicine | Istanbul, 34098 | One central EC under coordinating site per local regulation |
| TR-07 | Turkey | Osmangazi University Faculty of Medicine | Eskisehir, 26480 | One central EC under coordinating site per local regulation |
| TR-08 | Turkey | Trakya University Faculty of Medicine | Edirne, 22030 | One central EC under coordinating site per local regulation |
| TR-10 | Turkey | Akdeniz University Faculty of Medicine | Antalya, 07070 | One central EC under coordinating site per local regulation |
| TR-11 | Turkey | Adnan Menderes University Faculty of Medicine | Aydin, 09010 | One central EC under coordinating site per local regulation |
| TR-12 | Turkey | Gulhane Education and Research Hospital | Ankara, 06010 | One central EC under coordinating site per local regulation |
| TR-14 | Turkey | Necmettin Erbakan University Meram Faculty of Medicine Hospital | Konya, 42080 | One central EC under coordinating site per local regulation |
| TR-06 | Turkey | Bahcesehir University Hospital Medical Park Goztepe | Istanbul, 34732 | One central EC under coordinating site per local regulation |
| TR-13 | Turkey | Namık Kemal University Faculty of Medicine Application and Research Hospital | Tekirdağ, 59030 | One central EC under coordinating site per local regulation |
| TR-09 | Turkey | Mustafa Kemal University Hospital | Hatay, 31001 | One central EC under coordinating site per local regulation |
| UY-01 | Uruguay | Medica Uruguaya | Montevideo, 11300 | Comité de Etica de Medica Uruguaya | — |
| UY-02 | Uruguay | Ascociacion Española Primera de Socorros Mutuos | Montevideo, 11200 | Comité de Etica AESM | — |

**Abbreviations:** EC, ethics committee.

**Supplementary Table 2** Independent variablesincluded for logistic regression analysis models

| Variable | Range | Dichotomization/ Grouping | Models with independent variable included |
| --- | --- | --- | --- |
| Age | Numeric | — | 1–7 |
| Gender | Male, female | Male vs female | 1–7 |
| Education | No formal education, primary school, secondary school, non-university professional education, university | Less than secondary school vs secondary school or higher | 1–7 |
| Time since diagnosis | Numeric | <2 years vs ≥2 years | 1–7 |
| DAS28-ESR | Numeric | >3.2 ≤ 5.1 vs >5.1 | 1–7 |
| Number of comorbidities | Numeric | — | 1–7 |
| Morning stiffness | Numeric | — | 1–7 |
| Worst joint pain | Numeric | — | 1–7 |
| HAQ-DI | Numeric | — | 1–7 |
| Number of currently taken DMARDs | Numeric | — | 1–6 |
| FACIT-F | Numeric | — | 1, 3–7 |
| TSQM 1.4 global satisfaction | Numeric | — | 1, 3–6 |
| Most acceptable potential side effect of the medication | - Increased risk for infections - Allergic reaction - Deterioration of my laboratory values - Increased risk for malignancies - Weight gain - Hair thinning or loss - Skin symptoms - Effect on fertility - Increased risk for CVD | — | 1, 3–6 |
| Level of self-reported adherence | Numeric | — | 1, 3–5, 7 |
| Patient preference for monotherapy | Yes or no | Yes vs no | 1, 3, 4, 6 |
| Patient preference for oral administration | Yes or no | Yes vs no | 1, 3, 5, 6 |
| Current steroid use | Yes or no | Yes vs no | 2, 7 |
| Current methotrexate use | Yes or no | Yes vs no | 2, 7 |
| Current ts/bDMARD use | Yes or no | — | 2, 7 |
| Geographic areaa | Europe, South America, Japan | — | 2 |
| Place of residence | Rural or urban/towns | <10,000 vs ≥10,000 residents | 2 |
| Number of currently taken medications for comorbidities | Numeric | — | 2 |
| PtGA | Numeric | — | 2 |
| Presence of erosion on X-ray | Yes or no | — | 2 |
| Good treatment satisfaction | Yes or no | TSQM v1.4 global satisfaction score ≥80 vs <20 | 2 |
| TSQM 1.4 effectiveness subscore | Numeric | — | 2 |
| TSQM 1.4 side effects subscore | Numeric | — | 2 |
| TSQM 1.4 convenience subscore | Numeric | — | 2 |
| Presence of psychiatric disorder | Yes or no | Yes vs no | 7 |
| SF-36 PCS subscore | Numeric | — | 7 |
| SF-36 MCS subscore | Numeric | — | 7 |
| WPAI-RA total activity impairment (%) | Numeric | — | 7 |
| Currently taken DMARD (any) in monotherapy | Yes or no | — | 7 |

**Notes:** aEurope: Bulgaria, Croatia, Czech Republic, Estonia, Greece, Hungary, Latvia, Lithuania, Poland, Romania, Russian Federation, Slovakia, and Turkey; South America: Argentina, Brazil, Chile, and Uruguay; Asia: Japan.

**Abbreviations:** CVD, cardiovascular disease; DAS28-ESR, Disease Activity Score in 28 joints with erythrocyte sedimentation rate; bDMARD, biologic DMARD; DMARD, disease-modifying antirheumatic drug; FACIT-F, Functional Assessment of Chronic Illness Therapy-Fatigue; HAQ-DI, Health Assessment Questionnaire-Disability Index; MCS, Mental Component Summary; PCS, Physical Component Summary; PtGA, Patient Global Assessment; SF-36, 36-item Short Form Health Survey; tsDMARD, targeted synthetic DMARD; TSQM, Treatment Satisfaction Questionnaire for Medication; WPAI-RA, Work Productivity and Activity Impairment-Rheumatoid Arthritis.
